# Supplementary material for: Differentially expressed lnc‐NOS2P3‐miR‐939‐5p axis in chronic heart failure inhibits myocardial and endothelial cells apoptosis via iNOS/TNFα pathway
Source: PubMed Central journal article supplement (PMC7576245; doi:10.1111/jcmm.15740), 2020-08-25

# Supplementary figure 1

## A

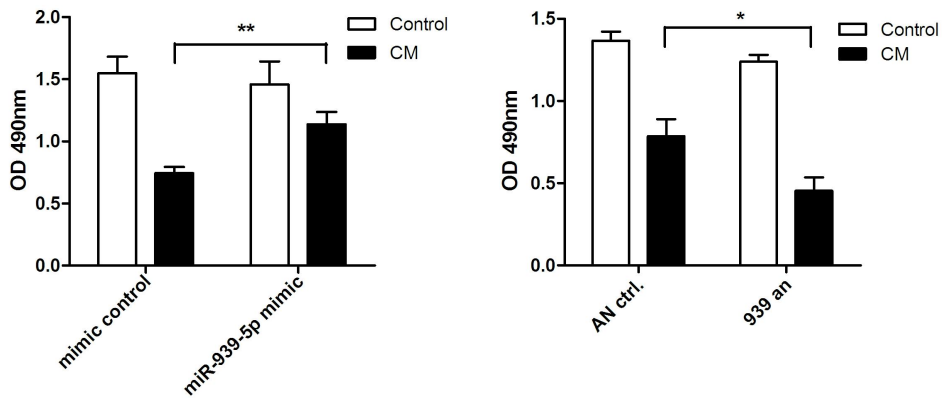

## B

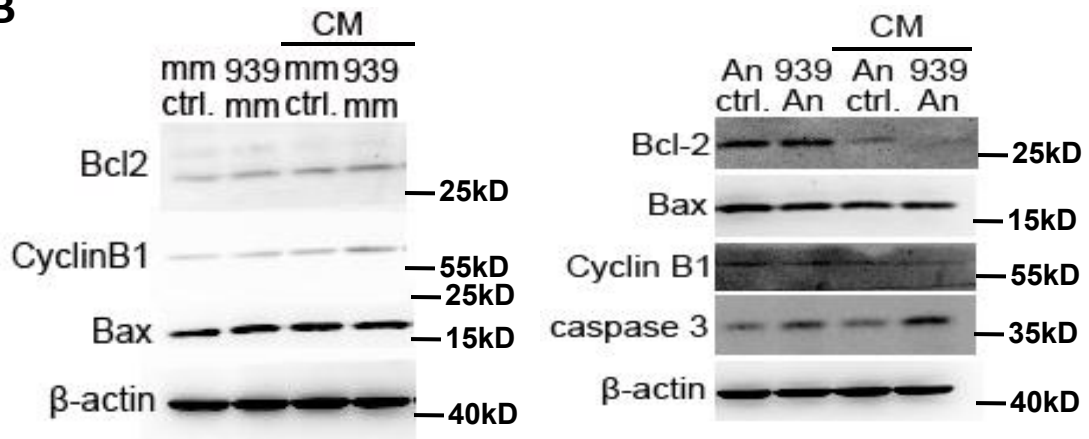

## C

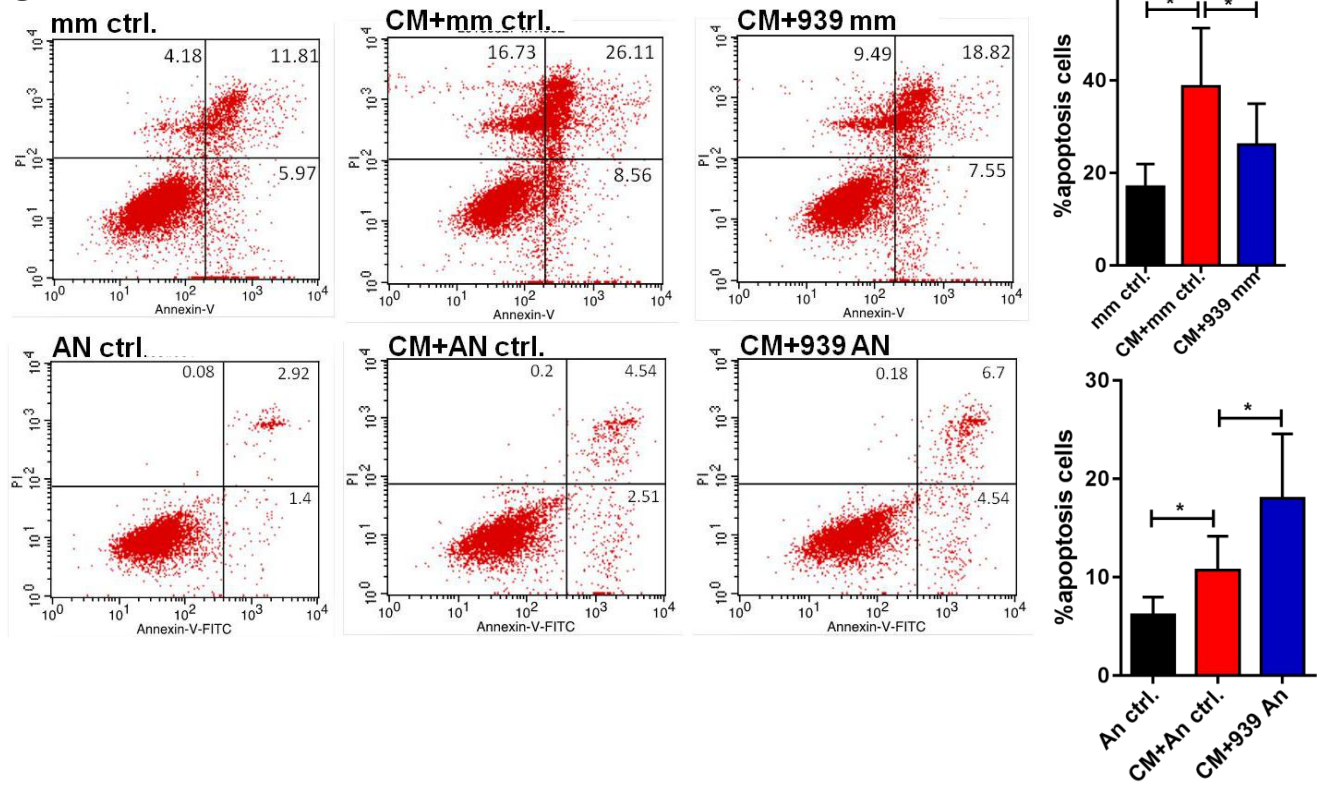

# Supplementary figure 2

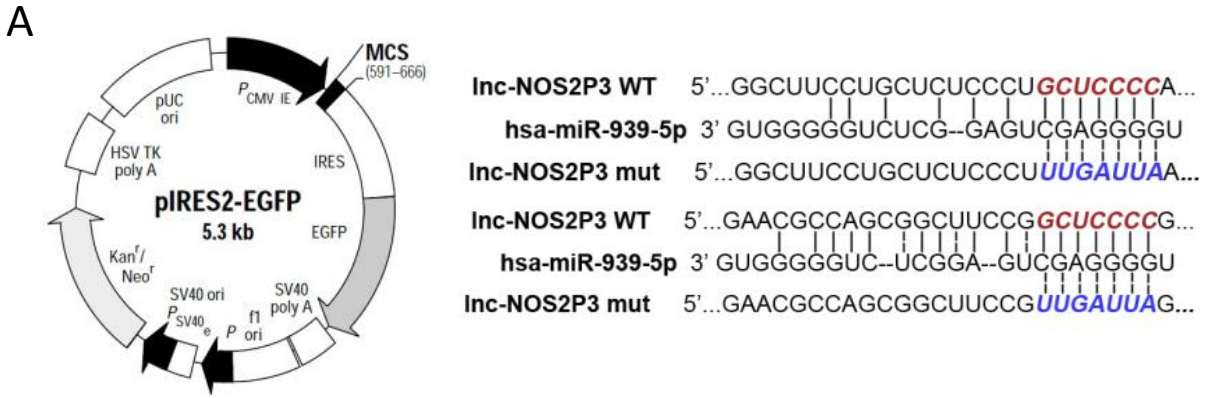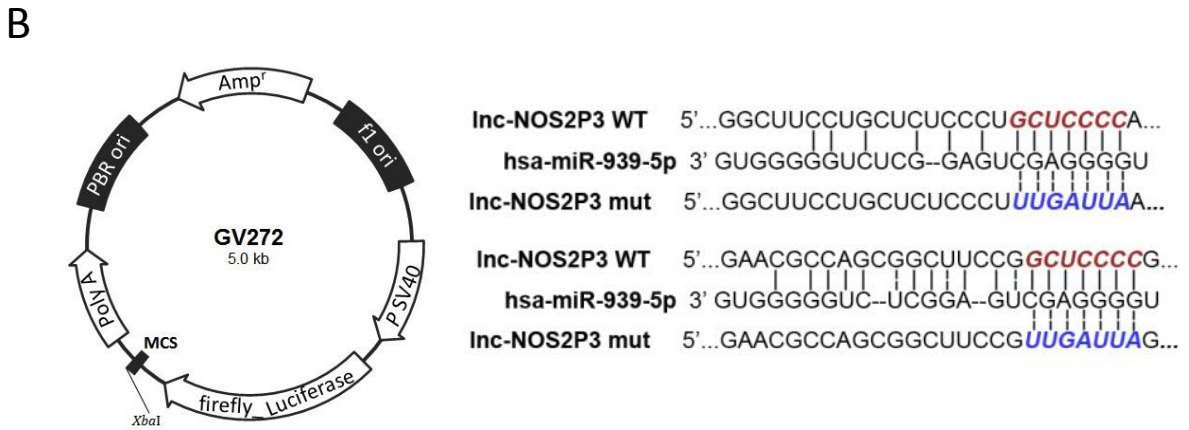

Supplement: JCMM-24-11381-s001.pdf [file JCMM-24-11381-s001.pdf]
